# Supplementary material for: Computational modeling to determine key regulators of hypoxia effects on the lactate production in the glycolysis pathway
Source: PubMed Central journal article supplement (PMC7280308; doi:10.1038/s41598-020-66059-w), 2020-06-08
Supplement: 41598_2020_66059_MOESM1_ESM.pdf [file 41598_2020_66059_MOESM1_ESM.pdf]

# **Computational modeling to determine key regulators of hypoxia effects on lactate production in the glycolysis pathway**

Shabnam Hashemzadeh<sup>1,2</sup>, Sedaghat Shahmorad<sup>3</sup>, Hashem Rafii-Tabar<sup>1,4\*</sup>, Yadollah Omid<sup>2,5\*</sup>

<sup>1</sup> Department of Medical Physics and Biomedical Engineering, School of Medicine, Shahid Beheshti University of Medical Sciences, Tehran, Iran

<sup>2</sup> Research Center for Pharmaceutical Nanotechnology, Biomedicine Institute, Tabriz University of Medical Sciences, Tabriz, Iran

<sup>3</sup> Department of Applied Mathematics, Faculty of Mathematical Sciences, University of Tabriz, Tabriz, Iran

<sup>4</sup> The Physics Branch of the IRI Academy of Sciences, Tehran, Iran

<sup>5</sup> Department of Pharmaceutics, Faculty of Pharmacy, Tabriz University of Medical Sciences, Tabriz, Iran

\*Corresponding authors:

Email: [rafii-tabar@nano.ipm.ac.ir](mailto:rafii-tabar@nano.ipm.ac.ir), Tehran, Iran. Fax: +982123872566;

Email: [yomidi@tbzmed.ac.ir](mailto:yomidi@tbzmed.ac.ir), Tabriz, Iran. Fax: +984133367929

## MATLAB program

%This program investigates the influence of hypoxia on the production  
%of glycolysis metabolites, especially lactate (y(11)). The program  
%output is the enzymes and or metabolites concentration vs time, you can  
%modify the program to have different levels of hypoxia (h=0:0.1:1). Hence,  
%metabolites concentration can be reported vs Hif-1 or oxygen levels during  
%different time intervals of hypoxia exposure. The detailed description of  
%the model has been explained in the paper.

```
clc
close all
clear

Vmglut3=8000;           %micM/min
kmglut3=5000;          %micM
kmglut1=3000;          %micM
kcatglut1=69960;       %min-1
E0glut=0.014;          %micM
kgluth=0.0001;         %min-1
kmglut2=25000;         %micM
kcatglut2=445500;      %min-1
kdglut=0.00016;        %min-1
kmhk=40.7;             %micM
khkh=0.003;           %min-1
kdhk=0.002;           %min-1
kcathk=12000;          %min-1
E0hk=0.47;            %micM
kpgih=0.037;          %min-1
kmpgil=480;           %micM
kmpgi2=272;           %micM
kcatpgi1=125400;       %min-1
kcatpgi2=119586.8;     %min-1
kdpgi=0.00048;        %min-1
E0pgi=33.2;           %micM
kmpfk=2000;           %micM
kcatpfk=61200;         %min-1
E0pfk=42.5;           %micM
kdpfk=0.00085;        %min-1
kpfkh=0.026;          %min-1
vmaldo1=1028106;       %micM/min
kmaldo1=3;             %micM
vmaldo2=832276.3;     %micM/min
kmaldo2=1000;          %micM
kmaldo22=2000;         %micM, for metabolite 2 in reverse direction
kmgapdh1=82;          %micM
kmgapdh2=130;         %micM
kgapdhh=0.83;         %min-1
kdgapdh=0.00016;      %min-1
E0gapdh=1195;         %micM
kcatgapdh1=17400;     %min-1
kcatgapdh2=19.81;     %min-1
kcatpgk=29210;        %min-1
```

```

kmpgk=16.7; %micM
E0pgk=64.4; %micM
kdpkgk=0.0013; %min-1
kpgkh=0.3; %min-1
kmpgm1=200; %micM
kmpgm2=190; %micM
kcatpgm1=60000; %min-1
kcatpgm2=27272.7; %min-1
E0pgm=173; %micM
kdpgm=0.0197; %min-1
kpgmh=0.36; %min-1
kmeno1=16.2; %micM
kmeno2=238; %micM
kenoh=0.23; %min-1
kcateno1=11160; %min-1
kcateno2=2610.96; %min-1
E0eno=135; %micM
kdeno=0.00048; %min-1
vmpk=2819725.8; %micM/min
kmpk=1500; %micM
kmpdk=20; %micM
kpdkh=0.000017; %min-1
kdpdk=0.00048; %min-1
kcatpdk=33; %min-1
E0pdk=0.01; %micM
kmpdh=10; %micM
E0pdh=27.2; %micM
kml dh1=200; %micM
kml dh2=11000; %micM
kcattpi1=350000; %micM
kcattpi2=7700092.4; %micM
kmtpi1=870; %micM
kmtpi2=460; %micM
E0tpi=96.6; %micM
ktpih=0.3; %min-1
kdtpi=0.069; %min-1
kldhh=0.003; %min-1
kcatldh1=122000; %min-1
kcatldh2=4900; %min-1
E0ldh=1.2; %micM
kdldh=0.0013; %min-1
kcatpdh=105800; %micM
kmg6pdh=77; %micM
kmpgcm2=45; %micM
kmpgcm1=670; %micM
E0pgcm=28.2; %micM
kpgcmh=0.065; %min-1
kdpgcm=0.00016; %min-1
kcatpgcm1=73700; %min-1
kcatpgcm2=127220.9; %min-1
glucose1ph=25; %micM
Eg=10000; %micM
vmg6pdh=120120; %micM/min
E0g6pdh=4.4; %micM
kAcCoA=10000; %min-1
E0pdp=0.02; %micM
kcatpdp=300; %min-1

```

```

kmpdp=7.6;           %micM
h=0;                 %micM,0:0.1:1

%d[C]/dt=vp-vd
f=@(t,y)[kcatglut1*y(14)*Eg/(kmglut1+Eg)-kcatglut2*y(14)*y(1)/(kmglut2+y(1))-
kcatk*y(15)*y(1)/(kmhk+y(1))+Vmglut3*Eg/(kmglut3+Eg);...
%dy(1)/dt
kcatk*y(15)*y(1)/(kmhk+y(1))-
kcatpgi1*y(16)*y(2)/(kmpgi1+y(2))+kcatpgi2*y(16)*y(3)/(kmpgi2+y(3))-
vmg6pdh*y(2)/(kmg6pdh+y(2))-
kcatpgcm1*y(26)*y(2)/(kmpgcm1+y(2))+kcatpgcm2*y(26)*glucose1ph/(kmpgcm2+gluco
selph);...           %dy(2)/dt
kcatpgi1*y(16)*y(2)/(kmpgi1+y(2))-kcatpgi2*y(16)*y(3)/(kmpgi2+y(3))-
kcatpfk*y(17)*y(3)/(kmpfk+y(3));...
%dy(3)/dt
kcatpfk*y(17)*y(3)/(kmpfk+y(3))-
vmaldo1*y(4)/(kmaldo1+y(4))+vmaldo2*y(5)/(kmaldo2+y(5))+
vmaldo2*y(12)/(kmaldo22+y(12));...
%dy(4)/dt
vmaldo1*y(4)/(kmaldo1+y(4))-
vmaldo2*y(5)/(kmaldo2+y(5))+kattpi1*y(18)*y(12)/(kmtpi1+y(12))-
kattpi2*y(18)*y(5)/(kmtpi2+y(5))+kcatgapdh2*y(19)*y(13)/(kmgapdh2+y(13))-
kcatgapdh1*y(19)*y(5)/(kmgapdh1+y(5));...           %dy(5)/dt
kcatpgk*y(20)*y(13)/(kmpgk+y(13))-
kcatpgm1*y(21)*y(6)/(kmpgm1+y(6))+kcatpgm2*y(21)*y(7)/(kmpgm2+y(7));...
%dy(6)/dt
kcatpgm1*y(21)*y(6)/(kmpgm1+y(6))-kcatpgm2*y(21)*y(7)/(kmpgm2+y(7))-
kateno1*y(22)*y(7)/(kmeno1+y(7))+kateno2*y(22)*y(8)/(kmeno2+y(8));...
%dy(7)/dt
kateno1*y(22)*y(7)/(kmeno1+y(7))-vmpk*y(8)/(kmpk+y(8))-
kateno2*y(22)*y(8)/(kmeno2+y(8));...
%dy(8)/dt
kcatpdh*y(24)*y(10)/(kmpdh+y(10))-kAcCoA*y(9);...
%dy(9)/dt
vmpk*y(8)/(kmpk+y(8))-kcatpdh*y(24)*y(10)/(kmpdh+y(10))-
kcatldh1*y(23)*y(10)/(kmldh1+y(10))+kcatldh2*y(23)*y(11)/(kmldh2+y(11));...
%dy(10)/dt
kcatldh1*y(23)*y(10)/(kmldh1+y(10))-kcatldh2*y(23)*y(11)/(kmldh2+y(11));...
%dy(11)/dt
vmaldo1*y(4)/(kmaldo1+y(4))-vmaldo2*y(12)/(kmaldo22+y(12))-
kattpi1*y(18)*y(12)/(kmtpi1+y(12))+kattpi2*y(18)*y(5)/(kmtpi2+y(5));...
%dy(12)/dt
kcatgapdh1*y(19)*y(5)/(kmgapdh1+y(5))-
kcatgapdh2*y(19)*y(13)/(kmgapdh2+y(13))-kcatpgk*y(20)*y(13)/(kmpgk+y(13));...
%dy(13)/dt
%d[E]/dt=kEh[h]-kd[E-E0]
(kgluth*h)-(kdglut*(y(14)-E0glut));...
%dy(14)/dt
(khkh*h)-(kdhk*(y(15)-E0hk));...
%dy(15)/dt
(kpgih*h)-(kdpgi*(y(16)-E0pgi));...
%dy(16)/dt
(kpfxh*h)-(kdpfk*(y(17)-E0pfx));...
%dy(17)/dt
(ktpih*h)-(kdtpi*(y(18)-E0tpi));...
%dy(18)/dt

```

```

(kgapdh*h)-(kdgapdh*(y(19)-E0gapdh));...
%dy(19)/dt
(kpgkh*h)-(kdpkgk*(y(20)-E0pgk));...
%dy(20)/dt
(kpgmh*h)-(kdpgm*(y(21)-E0pgm));...
%dy(21)/dt
(kenoh*h)-(kdeno*(y(22)-E0eno));...
%dy(22)/dt
(kldhh*h)-(kldlh*(y(23)-E0ldh));...
%dy(23)/dt
-kcatpdk*y(25)*(y(24))^2.3/(kmpdk+(y(24))^2.3)+kcatpdp*E0pdp*(E0pdh-
y(24))/(kmpdp+(E0pdh-y(24)));...
%dy(24)/dt
(kpdkh*h)-(kdpdk*(y(25)-E0pdk));...
%dy(25)/dt
(kpgcmh*h)-(kdpbcm*(y(26)-E0pgcm));
%dy(26)/dt
[t, y]=ode45(f, [0, 30], [2377 1033 362 46 21 44 5 8 1.3 56 4680 43 0.18
0.014 0.47 33.2 42.5 96.6 1195 64.4 173 135 1.2 27.2 0.01 28.2]);

%glucose
figure(1)
plot(t,y(:,1));
%glucose 6-phosphate
figure(2)
plot(t,y(:,2));
%fructose 6-phosphate
figure(3)
plot(t,y(:,3));
%fructose 1,6-bisphosphate
figure(4)
plot(t,y(:,4));
%glyceraldehyde 3-phosphate
figure(5)
plot(t,y(:,5));
%3-phosphoglycerate
figure(6)
plot(t,y(:,6));
%2-phosphoglycerate
figure(7)
plot(t,y(:,7));
%phosphoenolpyruvate
figure(8)
plot(t,y(:,8));
%Ac-CoA
figure(9)
plot(t,y(:,9));
%pyruvate
figure(10)
plot(t,y(:,10));
%lactate
figure(11)
plot(t,y(:,11));
%dihydroxyacetone phosphate
figure(12)
plot(t,y(:,12));
%1,3-bis phosphoglycerate

```

```
figure(13)
plot(t,y(:,13));
%glut
figure(14)
plot(t,y(:,14));
%hk
figure(15)
plot(t,y(:,15));
%pgi
figure(16)
plot(t,y(:,16));
%pfk
figure(17)
plot(t,y(:,17));
%tpi
figure(18)
plot(t,y(:,18));
%gapdh
figure(19)
plot(t,y(:,19));
%pgk
figure(20)
plot(t,y(:,20));
%pgm
figure(21)
plot(t,y(:,21));
%eno
figure(22)
plot(t,y(:,22));
%ldh
figure(23)
plot(t,y(:,23));
%pdh
figure(24)
plot(t,y(:,24));
%pdk
figure(25)
plot(t,y(:,25));
%pgcm
figure(26)
plot(t,y(:,26));
```

**Table S1.** Constants and initial conditions

| Constants, initial conditions        | Value<br>( $\mu\text{M}$ ) | Ref. | Constants, initial conditions | Value<br>( $\mu\text{M}$ ) | Ref. |
|--------------------------------------|----------------------------|------|-------------------------------|----------------------------|------|
| [glucose1-phosphate]0                | 25                         | 1    | $Km_{GLUT}$                   | 3000                       | 2    |
| [ $E_g$ ]                            | 10000                      | 3    | $Km_{GLUT2}$                  | 25000                      | 4    |
| [y1]0=[glucose]0                     | 2377                       | 5    | $Km_{HK}$                     | 40.7                       | 6    |
| [y2]0=[glucose 6-ph]0                | 1033                       | 5    | $Km_{PGI1}$                   | 480                        | 7    |
| [y3]0=[fructose 6-ph]0               | 362                        | 5    | $Km_{PGI2}$                   | 272                        | 7    |
| [y4]0=[fructose 1,6-bisphosphate]0   | 46                         | 5    | $Km_{PFK-1}$                  | 2000                       | 8    |
| [y5]0=[glyceraldehyde 3-phosphate]0  | 21                         | 5    | $Km_{ALDO1}$                  | 3                          | 9    |
| [y6]0=[3-phosphoglycerate]0          | 44                         | 5    | $Km_{ALDO2}$                  | 1000                       | 9    |
| [y7]0=[2-phosphoglycerate]0          | 5                          | 5    | $Km_{ALDO22}$                 | 2000                       | 9    |
| [y8]0=[phosphoenolpyruvate]0         | 8                          | 5    | $Km_{GAPDH1}$                 | 82                         | 10   |
| [y9]0=[Ac-CoA]0                      | 1.3                        | 5    | $Km_{GAPDH2}$                 | 130                        | 10   |
| [y10]0=[pyruvate]0                   | 56                         | 5    | $Km_{PGK}$                    | 16.7                       | 11   |
| [y11]0=[lactate]0                    | 4680                       | 5    | $Km_{PGM1}$                   | 200                        | 12   |
| [y12]0=[dihydroxyacetone phosphate]0 | 43                         | 5    | $Km_{PGM2}$                   | 190                        | 12   |
| [y13]0=[1,3-bis phosphoglycerate]0   | 0.18                       | 13   | $Km_{ENO1}$                   | 16.2                       | 14   |
| [y14]0=[GLU                          | 0.014                      | 2,15 | $Km_{ENO2}$                   | 238                        | 14   |
| [y15]0=[HK]0                         | 0.47                       | 5    | $Km_{PK}$                     | 1500                       | 16   |
| [y16]0=[PGI]0                        | 33.2                       | 5    | $Km_{PDK}$                    | 20                         | 17   |
| [y17]0=[PFK-1]0                      | 42.5                       | 5    | $Km_{PDH}$                    | 10                         | 18   |
| [y18]0=[TPI]0                        | 96.6                       | 5    | $Km_{LDH1}$                   | 200                        | 19   |
| [y19]0=[GAPDH]0                      | 1195                       | 5    | $Km_{LDH2}$                   | 11000                      | 19   |
| [y20]0=[PGK]0                        | 64.4                       | 5    | $Km_{TPI1}$                   | 870                        | 20   |
| [y21]0=[PGM]0                        | 173                        | 5    | $Km_{TPI2}$                   | 460                        | 20   |
| [y22]0=[ENO]0                        | 135                        | 5    | $Km_{G6PDH}$                  | 77                         | 21   |
| [y23]0=[LDH]0                        | 1.2                        | 5    | $Km_{PGCM1}$                  | 670                        | 22   |
| [y24]0=[PDH]0                        | 27.2                       | 5    | $Km_{PGCM2}$                  | 45                         | 22   |
| [y25]0=[PDK]0                        | 0.01                       | 23   |                               |                            |      |
| [y26]0=[PGCM]0                       | 28.2                       | 5    |                               |                            |      |
| H                                    | 0:0.1:1                    | 24   |                               |                            |      |

**Table S1.** Constants and initial conditions (continue)

| Constants, initial conditions | Value<br>(min <sup>-1</sup> ) | Ref. | Constants, initial conditions        | Value<br>(min <sup>-1</sup> ) | Ref.        |
|-------------------------------|-------------------------------|------|--------------------------------------|-------------------------------|-------------|
| $K_{cat_{GLUT1}}$             | 69960                         | 15   | $K_{d_{ENO}}$                        | 0.00048                       | 25          |
| $K_{cat_{GLUT2}}$             | 445500                        | Est  | $K_{d_{PDK}}$                        | 0.00048                       | 26          |
| $K_{cat_{HK}}$                | 12000                         | 5    | $K_{d_{TPI}}$                        | 0.069                         | 27          |
| $K_{cat_{PGI1}}$              | 125400                        | 5    | $K_{d_{LDH}}$                        | 0.0013                        | 28          |
| $K_{cat_{PGI2}}$              | 119586.8                      | 5,22 | $K_{d_{PGCM}}$                       | 0.00016                       | 29          |
| $K_{cat_{PFK-1}}$             | 61200                         | 5    | $K_{GLUTh}$                          | 0.0001                        | 30          |
| $K_{cat_{GAPDH1}}$            | 17400                         | 5    | $K_{HKh}$                            | 0.003                         | 30          |
| $K_{cat_{GAPDH2}}$            | 19.81                         | 5,31 | $K_{PGIh}$                           | 0.037                         | 32          |
| $K_{cat_{PGK}}$               | 29210                         | 5    | $K_{PFK-1h}$                         | 0.026                         | 32          |
| $K_{cat_{PGM1}}$              | 60000                         | 5    | $K_{PAPDHh}$                         | 0.83                          | 33          |
| $K_{cat_{PGM2}}$              | 27272.7                       | 5,12 | $K_{PGKh}$                           | 0.3                           | 34          |
| $K_{cat_{ENO1}}$              | 11160                         | 5    | $K_{PGMh}$                           | 0.36                          | 35          |
| $K_{cat_{ENO2}}$              | 2610.96                       | 5,36 | $K_{ENOh}$                           | 0.23                          | 37          |
| $K_{cat_{PDK}}$               | 33                            | 38   | $K_{PDHh}$                           | 0.000017                      | 39          |
| $k_{cat_{TPI1}}$              | 350000                        | 5    | $K_{TPIh}$                           | 0.3                           | 40          |
| $K_{cat_{TPI2}}$              | 7700092.4                     | 5,20 | $K_{LDHh}$                           | 0.003                         | 41          |
| $K_{cat_{LDH1}}$              | 122000                        | 19   | $K_{PGCMh}$                          | 0.065                         | 42          |
| $K_{cat_{LDH2}}$              | 4900                          | 43   | $K_{d_{Ac-CoA}}$                     | 10000                         | Est         |
| $K_{cat_{PDH}}$               | 105800                        | 5    | $K_{d_{PDK}}$                        | 0.00048                       | 26          |
| $K_{cat_{PGCM1}}$             | 73700                         | 5    | $K_{d_{TPI}}$                        | 0.069                         | 27          |
| $K_{cat_{PGCM2}}$             | 127220.9                      | 5,22 | $K_{d_{LDH}}$                        | 0.0013                        | 28          |
| $K_{d_{GLUT}}$                | 0.00016                       | 44   | $K_{d_{PGCM}}$                       | 0.00016                       | 29          |
| $K_{d_{HK}}$                  | 0.002                         | 28   | <b>Constants, initial conditions</b> | <b>Value</b>                  | <b>Ref.</b> |
| $K_{d_{PGI}}$                 | 0.00048                       | 26   | $V_{m_{GLUT}}$                       | 8000                          | 2           |
| $K_{d_{PFK-1}}$               | 0.00085                       | 26   | $V_{m_{ALDO1}}$                      | 1028106                       | 5           |
| $K_{d_{GAPDH}}$               | 0.00016                       | 45   | $V_{m_{ALDO2}}$                      | 832276.3                      | 5,46        |
| $K_{d_{PGK}}$                 | 0.0013                        | 28   | $V_{m_{PK}}$                         | 2819725.8                     | 5           |
| $K_{d_{PGM}}$                 | 0.0197                        | 47   | $V_{m_{G6PDH}}$                      | 120120                        | 5           |

$K_{cat}$ =catalytic constant,  $K_m$ = Michaelis–Menten constant,  $V_m$ =maximum velocity,  $K_d$ =degradation constant,  $K_{Eh}$ =constant of HIF effect on enzyme production, (calculated based on experimental data reported in respective references), 1=in forward direction, 2=in reverse direction. GLUT: glucose transporter, HK: hexokinase, PGI: phosphoglucoisomerase, PFK-1: phosphofructokinase-1, ALDO: aldolase, TPI: triosephosphate isomerase, GAPDH: glyceraldehyde 3-phosphate dehydrogenase, PGK: phosphoglycerate kinase, PGM: phosphoglycerate mutase, ENO: enolase, PK: pyruvate kinase, PDH: pyruvate dehydrogenase, PDK: pyruvate dehydrogenase kinase, PDP: pyruvate dehydrogenase phosphatase, p-PDH: phosphorylated pyruvate dehydrogenase, LDH: lactate dehydrogenase, PGCM: phosphoglucomutase, G6PDH: glucose 6-phosphate dehydrogenase, Eg: extracellular glucose, h: HIF-1, Est: estimated by the proposed model.



## References

- 1 Aiello, D. P., Fu, L., Miseta, A. & Bedwell, D. M. Intracellular glucose 1-phosphate and glucose 6-phosphate levels modulate Ca<sup>2+</sup> homeostasis in *Saccharomyces cerevisiae*. *J. Biol. Chem.* **277**, 45751-45758, doi: 10.1074/jbc.M208748200 (2002).
- 2 Day, P., Cleal, J., Lofthouse, E., Hanson, M. & Lewis, R. What factors determine placental glucose transfer kinetics? *Placenta* **34**, 953-958, doi:10.1016/j.placenta.2013.07.001 (2013).
- 3 J John, S. A., Ottolia, M., Weiss, J. N. & Ribalet, B. Dynamic modulation of intracellular glucose imaged in single cells using a FRET-based glucose nanosensor. *Pflugers Archiv.* **456**, 307-322, doi:10.1007/s00424-007-0395-z (2008).
- 4 Hajjawi, O. S. Glucose transport in human red blood cells. *Am. J. Biomed. Life Sci.* **1**, 44-52, doi:10.11648/j.ajbls.20130103.12 (2013).
- 5 Albe, K. R., Butler, M. H. & Wright, B. E. Cellular concentrations of enzymes and their substrates. *J. Theor. Biol.* **143**, 163-195, doi:10.1016/S0022 (1990).
- 6 Doenst, T., Han, Q., Goodwin, G. W., Guthrie, P. H. & Taegtmeier, H. Insulin does not change the intracellular distribution of hexokinase in rat heart. *Am. J. Physiol. Endocrinol. Metab.* **275**, E558-E567, doi:10.1152/ajpendo.1998.275.4.E558 (1998).
- 7 Jannaschk, D., Burgos, M., Centerlles, J. J., Ovadi, J. & Cascante, M. Application of metabolic control analysis to the study of toxic effects of copper in muscle glycolysis. *FEBS Lett.* **445**, 144-148, doi:10.1016/s0014-5793(99)00117-9 (1999).
- 8 Dunaway, G. A., Kasten, T. P., Sebo, T. & Trapp, R. Analysis of the phosphofructokinase subunits and isoenzymes in human tissues. *Biochem. J.* **251**, 677-683, doi:10.1042/bj2510677 (1988).
- 9 Penhoet, E. E., Kochman, M. & Rutter, W. J. Molecular and catalytic properties of aldolase C. *Biochemistry* **8**, 4396-4402, doi:10.1021/bi00839a026 (1969).
- 10 Lambeir, A. M. *et al.* The cytosolic and glycosomal glyceraldehyde-3-phosphate dehydrogenase from *Trypanosoma brucei*: Kinetic properties and comparison with homologous enzymes. *Eur. J. Biochem.* **198**, 429-435, doi:10.1111/j.1432-1033.1991.tb16032.x (1991).
- 11 Khoroshilova, N. A., Muronetz, V. I. & Nagradova, N. K. Interaction between d-glyceraldehyde-3-phosphate dehydrogenase and 3-phosphoglycerate kinase and its functional consequences. *FEBS Lett.* **297**, 247-249, doi:10.1016/0014-5793(92)80548-U (1992).
- 12 Fraser, H. I., Kvaratskhelia, M. & White, M. F. The two analogous phosphoglycerate mutases of *Escherichia coli*. *FEBS Lett.* **455**, 344-348, doi:10.1016/S0014-5793(99)00910-2 (1999).
- 13 Nakayama, Y., Kinoshita, A. & Tomita, M. Dynamic simulation of red blood cell metabolism and its application to the analysis of a pathological condition. *Theor. Biol. Med. Model.* **2**, 18-28, doi:10.1186/1742-4682-2-18 (2005).
- 14 Hannaert, V. *et al.* Kinetic characterization, structure modelling studies and crystallization of *Trypanosoma brucei* enolase. *Eur. J. Biochem.* **270**, 3205-3213, doi:10.1046/j.1432-1033.2003.03692.x (2003).
- 15 Simpson, I. A., Carruthers, A. & Vannucci, S. J. Supply and demand in cerebral energy metabolism: the role of nutrient transporters. *J. Cereb. Blood Flow Metab.* **27**, 1766-1791, doi:10.1038/sj.jcbfm.9600521 (2007).
- 16 Boxer, M. B. *et al.* Evaluation of substituted N, N'-diarylsulfonamides as activators of the tumor cell specific M2 isoform of pyruvate kinase. *J. Med. Chem.* **53**, 1048-1055, doi:10.1021/jm901577g (2009).

- 17 Hucho, F. *et al.*  $\alpha$ -Keto acid dehydrogenase complexes: XVII. Kinetic and regulatory properties of pyruvate dehydrogenase kinase and pyruvate dehydrogenase phosphatase from bovine kidney and heart. *Arch. Biochem. Biophys.* **151**, 328-340, doi:10.1016/0003-9861(72)90504-8 (1972).
- 18 Korotchkina, L. G. & Patel, M. S. Probing the mechanism of inactivation of human pyruvate dehydrogenase by phosphorylation of three sites. *J. Biol. Chem.* **276**, 5731-5738, doi:10.1074/jbc.M007558200 (2001).
- 19 Pesce, A., Fondy, T. P., Stolzenbach, F., Castillo, F. & Kaplan, N. O. The comparative enzymology of lactic dehydrogenases III. Properties of the H4 and M4 enzymes from a number of vertebrates. *J. Biol. Chem.* **242**, 2151-2167 (1967).
- 20 Veech, R., Rajjman, L., Dalziel, K. & Krebs, H. Disequilibrium in the triose phosphate isomerase system in rat liver. *Biochem. J.* **115**, 837-842 (1969).
- 21 Grabowska, D. *et al.* A novel mutation in the glucose-6-phosphate dehydrogenase gene in a subject with chronic nonspherocytic hemolytic anemia—characterization of enzyme using yeast expression system and molecular modeling. *Blood Cells. Mol. Dis.* **32**, 124-130, doi:10.1016/j.bcmd.2003.11.001 (2004).
- 22 Kashiwaya, Y. *et al.* Control of glucose utilization in working perfused rat heart. *J. Biol. Chem.* **269**, 25502-25514 (1994).
- 23 Ramström, H. *et al.* Properties and regulation of the bifunctional enzyme HPr kinase/phosphatase in *Bacillus subtilis*. *Journal of Biological Chemistry* **278**, 1174-1185, doi:10.1074/jbc.M209052200 (2003).
- 24 Qutub, A. A. & Popel, A. S. A computational model of intracellular oxygen sensing by hypoxia-inducible factor HIF1 $\alpha$ . *Journal of cell science* **119**, 3467-3480, doi:10.1242/jcs.03087 (2006).
- 25 Tiainen, M., Roine, R. O., Pettilä, V. & Takkunen, O. Serum neuron-specific enolase and S-100B protein in cardiac arrest patients treated with hypothermia. *Stroke* **34**, 2881-2886, doi:10.1161/01.STR.0000103320.90706.35 (2003).
- 26 Illg, D. & Pette, D. Turnover Rates of Hexokinase I, Phosphofructokinase, Pyruvate Kinase and Creatine Kinase in Slow-Twitch Soleus Muscle and Heart of the Rabbit. *Eur. J. Biochem.* **97**, 267-273, doi:10.1111/j.1432-1033.1979.tb13111.x (1979).
- 27 Alvarez, M. *et al.* Triose-phosphate Isomerase (TIM) of the Psychrophilic Bacterium *Vibrio marinus* KINETIC AND STRUCTURAL PROPERTIES. *Journal of Biological Chemistry* **273**, 2199-2206, doi:10.1074/jbc.273.4.2199 (1998).
- 28 J Jones, G. M. & Mayer, R. Degradation of glucose-metabolizing enzymes in the rat small intestine during starvation. *Biochem. J.* **132**, 657-661, doi:10.1042/bj1320657a (1973).
- 29 Wang, Y. & Zhang, Y. H. A highly active phosphoglucomutase from *Clostridium thermocellum*: cloning, purification, characterization and enhanced thermostability. *Journal of applied microbiology* **108**, 39-46, doi:10.1111/j.1365-2672.2009.04396.x (2010).
- 30 Shinohara, Y., Hino, M., Ishida, T., Yamanaka, Y. & Terada, H. Growth condition-dependent synchronized changes in transcript levels of type II hexokinase and type I glucose transporter in tumor cells. *Biochimica et Biophysica Acta (BBA)-Molecular Cell Research* **1499**, 242-248, doi:10.1016/S0167-4889(00)00125-7 (2001).
- 31 Boschi-Muller, S., Azza, S., Pollastro, D., Corbier, C. & Branlant, G. Comparative Enzymatic Properties of GapB-encoded Erythrose-4-Phosphate Dehydrogenase of *Escherichia coli* and Phosphorylating Glyceraldehyde-3-phosphate Dehydrogenase. *J. Biol. Chem.* **272**, 15106-15112, doi:10.1074/jbc.272.24.15106 (1997).
- 32 Bousquet, P. A. *et al.* Hypoxia strongly affects mitochondrial ribosomal proteins and translocases, as shown by quantitative proteomics of HeLa cells. *International journal of proteomics* **2015**, 678527-678536, doi:org/10.1155/2015/678527 (2015).
- 33 Escoubet, B., Planès, C. & Clerici, C. Hypoxia increases glyceraldehyde-3-phosphate dehydrogenase transcription in rat alveolar epithelial cells. *Biochem. Biophys. Res. Commun.* **266**, 156-161, doi:10.1006/bbrc.1999.1798 (1999).

- 34 Lam, W., Bussom, S. & Cheng, Y.-C. Effect of hypoxia on the expression of phosphoglycerate kinase and antitumor activity of troxacitabine and gemcitabine in non-small cell lung carcinoma. *Molecular cancer therapeutics* **8**, 415-423, doi: 10.1158/1535-7163.MCT-08-0692 (2009).
- 35 Takahashi, Y., Takahashi, S., Yoshimi, T. & Miura, T. Hypoxia-induced expression of phosphoglycerate mutase B in fibroblasts. *European journal of biochemistry* **254**, 497-504, doi:10.1046/j.1432-1327.1998.2540497.x (1998).
- 36 Pietkiewicz, J., Bednarz-Misa, I., Jermakow, K. & Gamian, A. Enolase from *Klebsiella pneumoniae* and human muscle cells ii. kinetic parameters and sensitivity to fluoride and phosphate inhibitors. *Advances in Clinical and Experimental Medicine* **18**, 221-233 (2009).
- 37 Sedoris, K. C., Thomas, S. D. & Miller, D. M. Hypoxia induces differential translation of enolase/MBP-1. *BMC Cancer* **10**, 157-170, doi:10.1186/1471-2407-10-157 (2010).
- 38 Tovar-Méndez, A., Hirani, T. A., Miernyk, J. A. & Randall, D. D. Analysis of the catalytic mechanism of pyruvate dehydrogenase kinase. *Archives of biochemistry and biophysics* **434**, 159-168, doi:10.1016/j.abb.2004.10.017 (2005).
- 39 Kim, J.-w., Tchernyshyov, I., Semenza, G. L. & Dang, C. V. HIF-1-mediated expression of pyruvate dehydrogenase kinase: a metabolic switch required for cellular adaptation to hypoxia. *Cell metabolism* **3**, 177-185, doi:10.1016/j.cmet.2006.02.002 (2006).
- 40 Gess, B., Hofbauer, K.-H., Deutzmann, R. & Kurtz, A. Hypoxia up-regulates triosephosphate isomerase expression via a HIF-dependent pathway. *Pflügers Archiv* **448**, 175-180, doi:10.1007/s00424-004-1241-1 (2004).
- 41 Firth, J. D., Ebert, B. L. & Ratcliffe, P. J. Hypoxic regulation of lactate dehydrogenase A Interaction between hypoxia-inducible factor 1 and cAMP response elements. *Journal of Biological Chemistry* **270**, 21021-21027, doi:10.1074/jbc.270.36.21021 (1995).
- 42 Pelletier, J. *et al.* Glycogen synthesis is induced in hypoxia by the hypoxia-inducible factor and promotes cancer cell survival. *Frontiers in oncology* **2**, 18-27, doi:10.3389/fonc.2012.00018 (2012).
- 43 Gomez, M. S. *et al.* Substrate and cofactor specificity and selective inhibition of lactate dehydrogenase from the malarial parasite *P. falciparum*. *Mol. Biochem. Parasitol.* **90**, 235-246, doi:10.1016/s0166-6851(97)00140-0 (1997).
- 44 Heilig, C. *et al.* Implications of glucose transporter protein type 1 (GLUT1)-haplodeficiency in embryonic stem cells for their survival in response to hypoxic stress. *The American journal of pathology* **163**, 1873-1885, doi:10.1016/S0002-9440(10)63546-8 (2003).
- 45 Kuehl, L. & Sumsion, E. N. Turnover of several glycolytic enzymes in rat liver. *Journal of Biological Chemistry* **245**, 6616-6623 (1970).
- 46 Malay, A. D., Prociou, S. L. & Tolan, D. R. The temperature dependence of activity and structure for the most prevalent mutant aldolase B associated with hereditary fructose intolerance. *Arch. Biochem. Biophys.* **408**, 295-304, doi:10.1016/s0003-9861(02)00546-5 (2002).
- 47 Nairn, J. *et al.* The use of mass spectrometry to examine the formation and hydrolysis of the phosphorylated form of phosphoglycerate mutase. *FEBS Lett.* **359**, 192-194, doi:0.1016/0014-5793(95)00044-a (1995)
